# Supplementary material
Source: HighWire-hosted journal article supplement (http://dmd.aspetjournals.org/highwire/filestream/73417/field_highwire_adjunct_files/0/85092SupplFigures.pdf)
Supplement: 85092SupplFigures.pdf [file 85092SupplFigures.pdf]

**Interplay between Carboxylesterase 2 and Intestine  
Transporters Limits the Bioavailability of Allisartan, a prodrug  
of Exp3174 for Hypertension Treatment in Humans**

**Xiuli Li<sup>1</sup>, Jingchao Sun<sup>2</sup>, Zitao Guo<sup>1</sup>, Dafang Zhong<sup>1</sup>, and Xiaoyan Chen<sup>1</sup>**

<sup>1</sup> *Shanghai Institute of Materia Medica, Chinese Academy of Sciences, Shanghai,  
China*

<sup>2</sup> *Shenzhen Salubris Pharmaceutical Co., Ltd, Guangdong, China*

**Drug Metabolism and Disposition**

**Figure legends**

Supplemental Fig. 1. Western blot analysis of HEK293-OATP2B1 and HEK293-Mock cells for OATP2B1 detection. A total of 20  $\mu$ g of cell proteins were subjected to SDS-PAGE and transferred to NC membrane for immunostaining. 1, HEK293-OATP2B1; 2, HEK293-Mock.

Supplemental Fig. 2. The time course of transport of Exp3174 in basolateral receiver side in Caco-2 monolayer cells. The concentration of Exp3174 was 50  $\mu$ M.

Supplemental Fig. 3. Western blot analysis of Caco-2, HEK293-OATP2B1, and MDCK-MDR1 cells for CES1 detection. A total of 8  $\mu$ g of cell proteins were subjected to SDS-PAGE and transferred to PVDF membrane for immunostaining. 1, Caco-2; 2, HEK293-OATP2B1; 3, MDCK-MDR1. \* monomeric form of CES1.

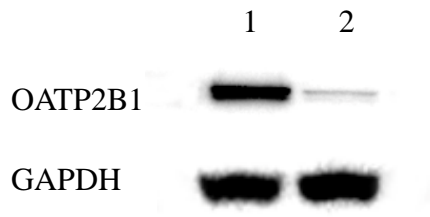

**Supplemental Fig. 1**

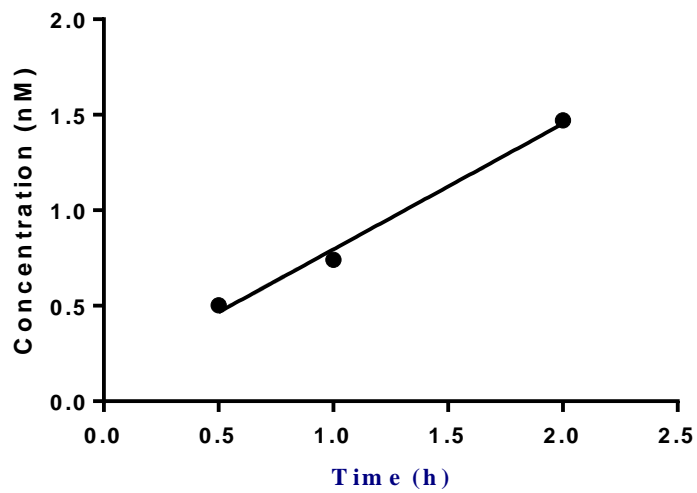

Supplemental Fig. 2

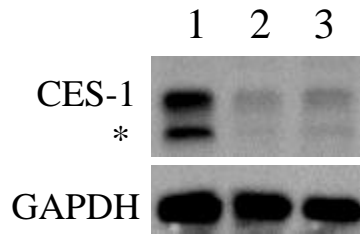

**Supplemental Fig. 3**
